# Supplementary material for: iDamIDseq and iDEAR: an improved method and computational pipeline to profile chromatin-binding proteins
Source: Oxford University Press journal article supplement (doi:10.1242/dev.139261), 2016-10-05
Supplement: dev139261supp.pdf [file dev139261supp.pdf]

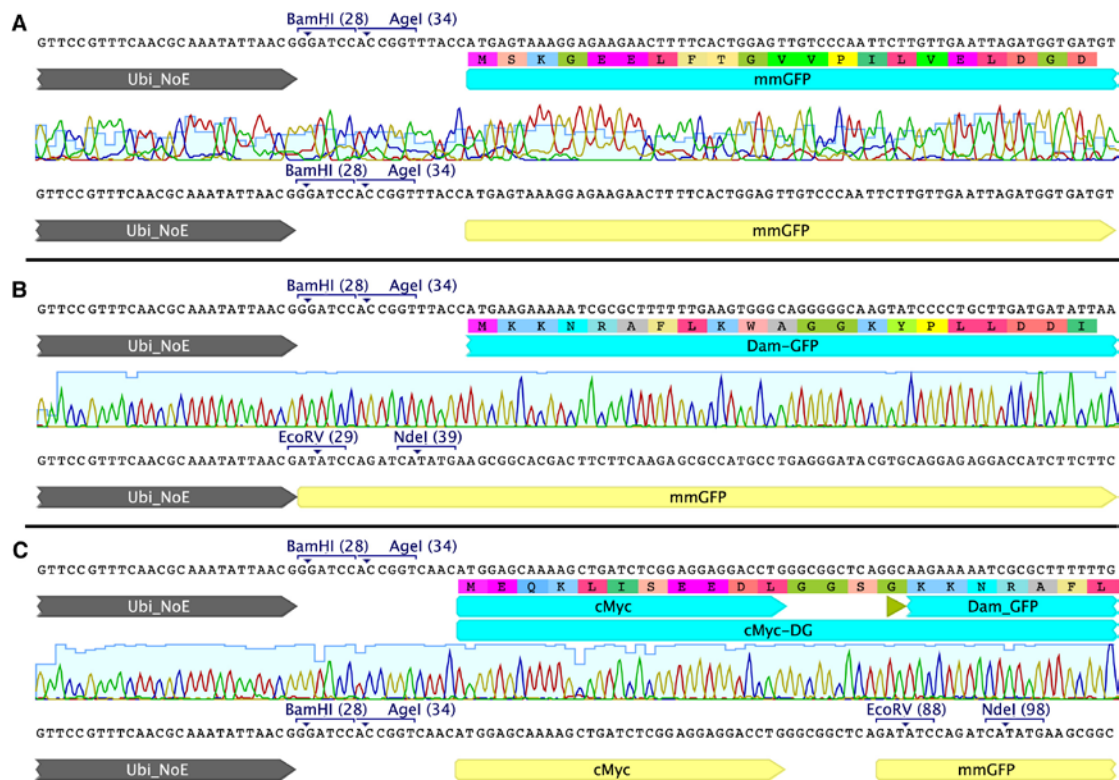

Supplementary Figure 2. Aberrant splicing events occurring in the transcripts from constructs carrying *E. coli* Dam fused to mmGFP in medaka hatchling larvae. The expected products are shown above the respective chromatograms. (A) The ubiquitin non-coding exon (NoE) uses the correct acceptor splice site upstream of the BamHI restriction site just upstream the start codon of mmGFP. (B) In Dam-GFP fusion, NoE splices to an internal cryptic acceptor site in the mmGFP sequence, skipping completely the *Dam* coding sequence. (C) In the cMyc-Dam-GFP construct, NoE splices to the correct acceptor splice site as for mmGFP. However a second splicing event occurs after the cMyc sequence between a cryptic donor site, just upstream of the *Dam* gene, and the same internal cryptic acceptor site in the mmGFP sequence (not shown here) completely skipping the *Dam* coding sequence.

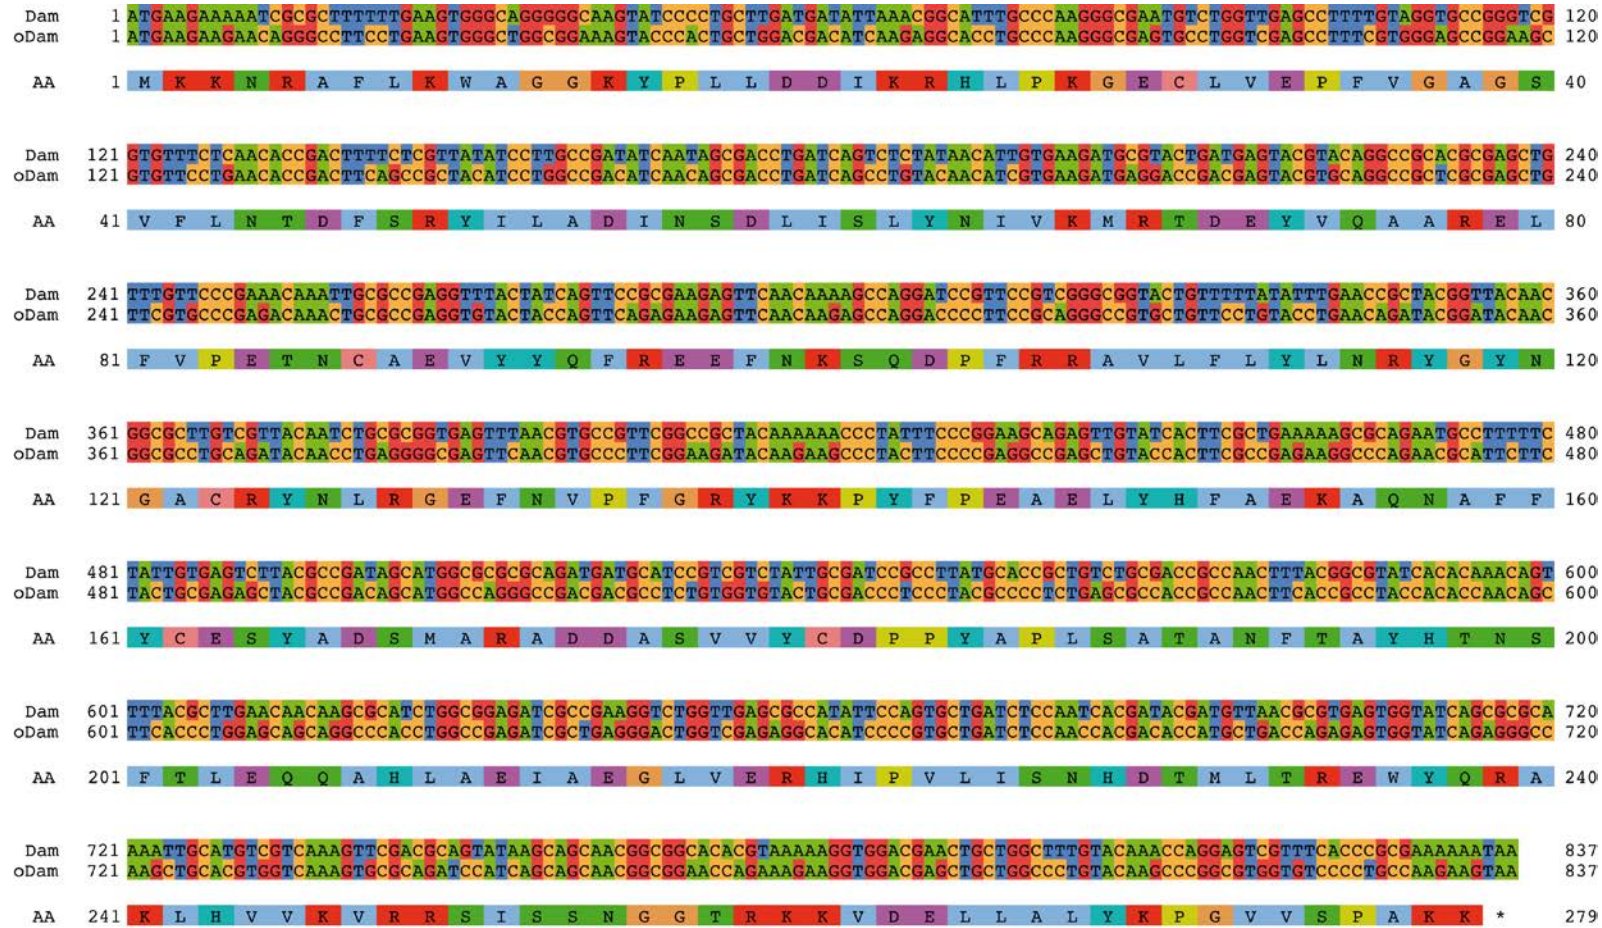

Supplementary Figure 3. Alignment of the *Dam* gene used in this study (DamL122A) and the optimized version.

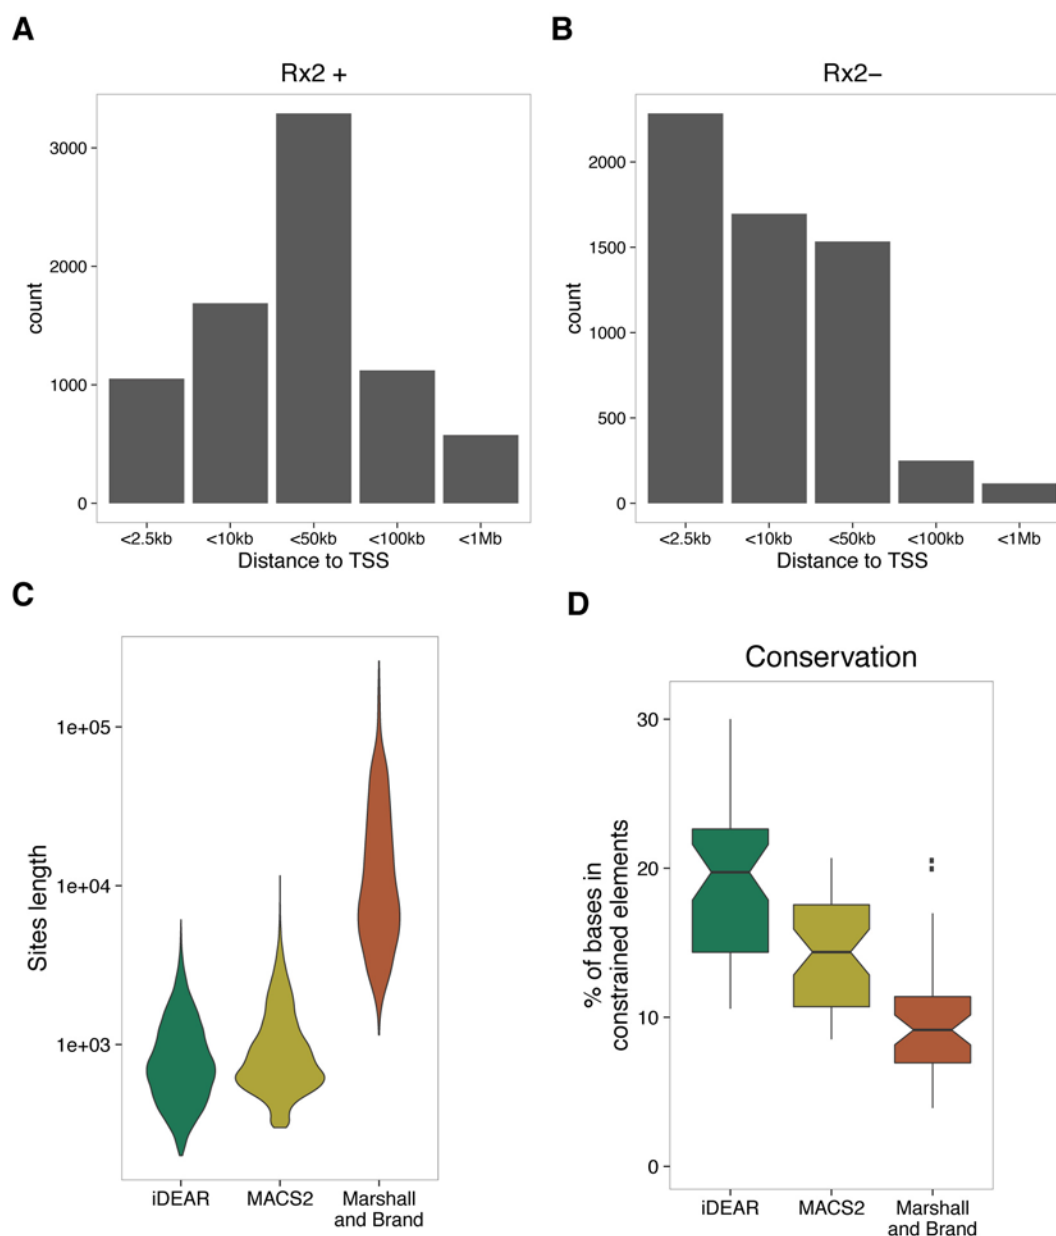

Supplementary Figure 4. Characterization of the Rx2 sites. A-B) Most Rx2 occupied sites tend to be within 10kb and 50kb of annotated transcription start sites (TSS) but Rx2 negative sites tend to be in the proximal upstream region of genes. C) Length distribution of the Rx2 bound sites identified by iDEAR, MACS2 and the Marshall and Brand pipeline. iDEAR provides regions around 1kb long, similar to MACS2, but Marshall and Brand gives regions always above that length and even some over 100kb. D) Degree of overlap of the sites identified by each tool with evolutionary constrained elements in fish. iDEAR shows a higher sensitivity with respect to conservation.

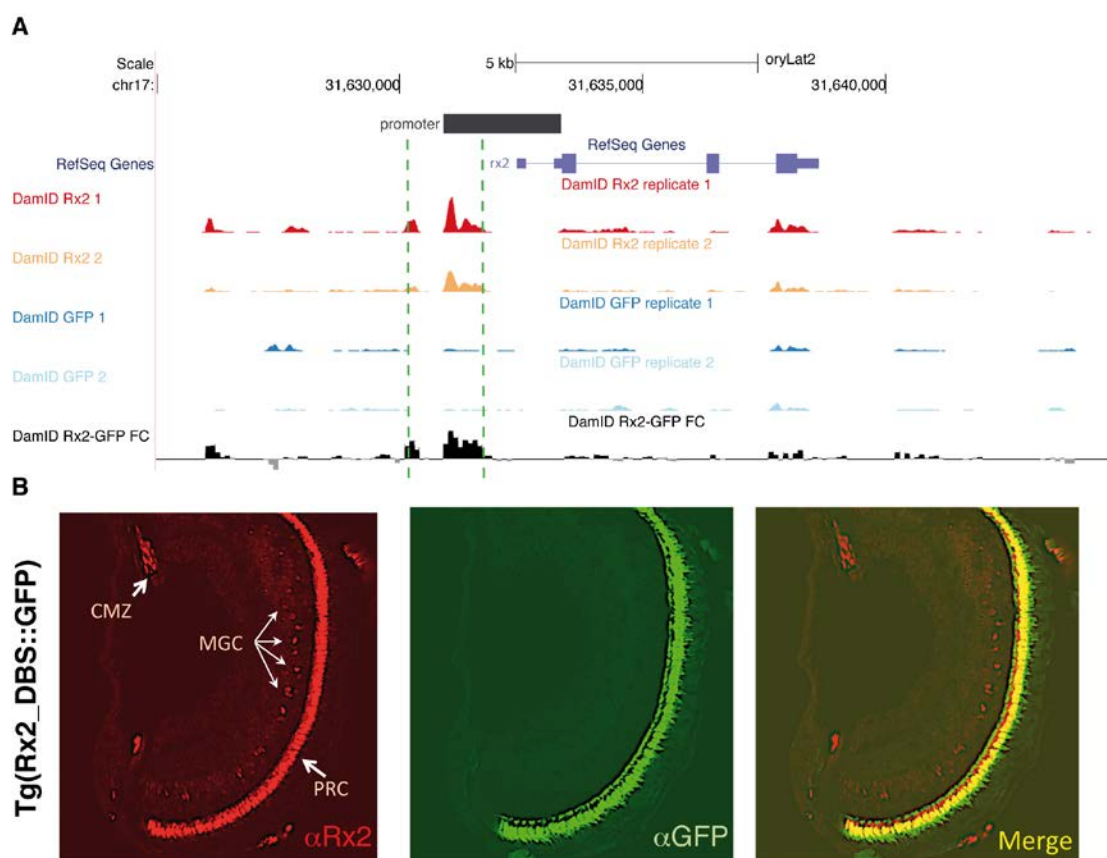

Supplementary Figure 5. Functional validation of the Rx2 binding site on its own promoter. A) Representation of the iDamIDseq signal around the *Rx2* locus showing the normalized read coverage for each one of the replicates of Rx2 and GFP fusions and the log<sub>2</sub> fold change of the average signal per replica (track in black at the bottom). The black bar over the RefSeq Genes track represents the previously characterized Rx2 promoter. The area of maximum Rx2 enrichment is included in the 5' end of this promoter. B) The Rx2\_DBS element, sequence delimited by the green dashed lines in A, displays regulatory activity in the photoreceptor cell layer (PRC). The iDamID Rx2\_DBS fragment was cloned in a GFP reporter plasmid. Immunofluorescence of retinal sections of hatchling animals from the stable line Tg(Rx2\_DBS::GFP) shows complete colocalization of the GFP (green) with the expression domain of Rx2 (red) in the PRC. CMZ, ciliary marginal zone; MGC, Müller glia cells.

Table S1. List of primers. All primers except AdR\_PCR are unmodified. \*Bold-face letters of the AdR\_PCR primer represent the bases modified with phosphorothioate bonds.

| Primer (5'-3')                                                                         |                  |
|----------------------------------------------------------------------------------------|------------------|
| AATTTACCGGTAACATGAAGAAAAATCGCGCTTTTTTG                                                 | N_Dam fwd        |
| AATTTGCTAGCTTTTTTCGCGGGTGAAACGACTCCTG                                                  | N_Dam rev        |
| CTACGGTTACAACGGCgctTGTCGTTACAATCTG                                                     | L122A fwd        |
| CAGATTGTAACGACAagCGCGTTGTAACCGTAG                                                      | L122A rev        |
| AATTTACCGGTCAACATGGAGCAAAAGCTGATCTCGGAGGAGGACCTGGGCGGCTCAGGCAAGAAAAATCGCGCTTTTTTGAAGTG | N_cMyc_Dam fwd   |
| AATTTACTAGTGAACAGAACTCATCTCTGAAGAGGATCTGGCACCCGGAAGAAAAATCGCGCTTTTTTGAAGTG             | C_cMyc_Dam fwd   |
| CTAGCCTGAGCGGTGGAGGCGGTTTCAGGCGGAGGTGGCTCTGGCGGTGGCGGATCGGGAGGCGGTGGAAGTGCAGCCGCGA     | Flexilinker      |
| CTAGTCGCGGCTGCACCTCCACCGCCTCCCGATCCGCCACCGCCAGGCCACCTCCGCTGAACCGCCTCCACCGCTCAGG        | Flexilinker      |
| AATTTACTAGTATGAGTAAAGGAGAAGAAGCTTTTC                                                   | C_mmGFP fwd      |
| AATTTTCTAGATTATTTGTATAGTTCATCCATGC                                                     | C_mmGFP rev      |
| AATTTTCTAGATCTAGATTAGTCCAGCCTGGGCTCTTTGGGAGGTGGTTTGTATAGTTCATCCATGCCATGTG              | C_oNLS-mmGFP rev |
| AATTTACCGGTACCATGAGTAAAGGAGAAGAAGCTTTTCAC                                              | N_mmGFP fwd      |
| AATTTGCTAGCTTTGTATAGTTCATCCATGCCATG                                                    | N_mmGFP rev      |
| AATTTACTAGTATGCTTTTCGCATGCCGACCTGCTG                                                   | C_Dr-OtpA fwd    |
| AATTTTCTAGATTAGGTGAAGCTCATGGACACTGTGTG                                                 | C_Dr-OtpA rev    |
| AATTTACCGGTACCATGCTTTTCGCATGCCGACCTGCTG                                                | N_Dr-OtpA fwd    |
| AATTTGCTAGCGGTGAAGCTCATGGACACTGTGTG                                                    | N_Dr-OtpA rev    |
| AATTTACTAGTATGCATTTGTCAATGGATACCCTG                                                    | C_Ol-Rx2 fwd     |
| AATTTTCTAGATTACATGTGCTGCCAGGTTTTATC                                                    | C_Ol-Rx2 rev     |
| AATTTACCGGTACCATGCATTTGTCAATGGATACCCTG                                                 | N_Ol-Rx2 fwd     |
| AATTTGCTAGCCATGTGCTGCCAGGTTTTATCCATG                                                   | N_Ol-Rx2 rev     |
| AATTTACTAGTATGTATAACATGATGGAGACTGAAC                                                   | C_Ol-Sox2b fwd   |
| AATTTTCTAGATTACATGTGTGTTAACGGCAGCG                                                     | C_Ol-Sox2b rev   |
| AATTTACCGGTACCATGTATAACATGATGGAGACTGAAC                                                | N_Ol-Sox2b fwd   |
| AATTTGCTAGCCATGTGTGTTAACGGCAGCGTGC                                                     | N_Ol-Sox2b rev   |
| AATTTGGCGCGCGGATCTCAGGGACTTACACTGTCATC                                                 | Rx2(Rx2_BDS) fwd |
| AATTTACTAGTCAGCTACAGTAGGTGTTGCAGAG                                                     | Rx2(Rx2_BDS) rev |
| CTAATACGACTCACTATAGGGCAGCGTGGTCGCGGCCGAGGA                                             | AdRt             |
| TCCTCGGCCG                                                                             | AdRb             |
| <b>GGTCGCGGCCGAGGATC*</b>                                                              | AdR_PCR          |
| GAGCCGTAAGTTCGGTTCAAC                                                                  | RT_Ubi_fwd       |
| ATGTGTAATCCCAGCAGCGG                                                                   | RT_mmGFP_rev     |

Table S2. Rx2-enriched sites and Rx2-depleted sites

[Click here to download Table S2](#)
